# Supplementary material for: Evolutionary Relations of Hexanchiformes Deep-Sea Sharks Elucidated by Whole Mitochondrial Genome Sequences
Source: Hindawi journal article supplement (doi:10.1155/2013/147064), 2013-01-01

### **Supplementary figure 1**

Neighbour-joining (A) and Bayesian inference (B) phylogenetic trees depicting genetic relationships among 19 Chondrichthyes species inferred from the whole mtDNA region. The 13,749 bp nucleotide alignment (Align\_Set\_1) was used for the analysis. Numbers showing on the branches are bootstrap support values in A and posterior probability in B. Bold letters indicate the nucleotide sequences of the species that we newly determined in this study.

### **Supplementary figure 2**

Maximum likelihood (A), Neighbour-joining (B) and Bayesian inference (C) phylogenies depicting genetic relationships among 18 Selachii and Batoidea species inferred from the whole mtDNA region. The 13,784 bp nucleotide alignment (Align\_Set\_2) was used for the analysis. Numbers showing on the branches are bootstrap support values in A and B and posterior probability in C. Bold letters indicate the nucleotide sequences of the species that we newly determined in this study.

# Supplementary figure 1

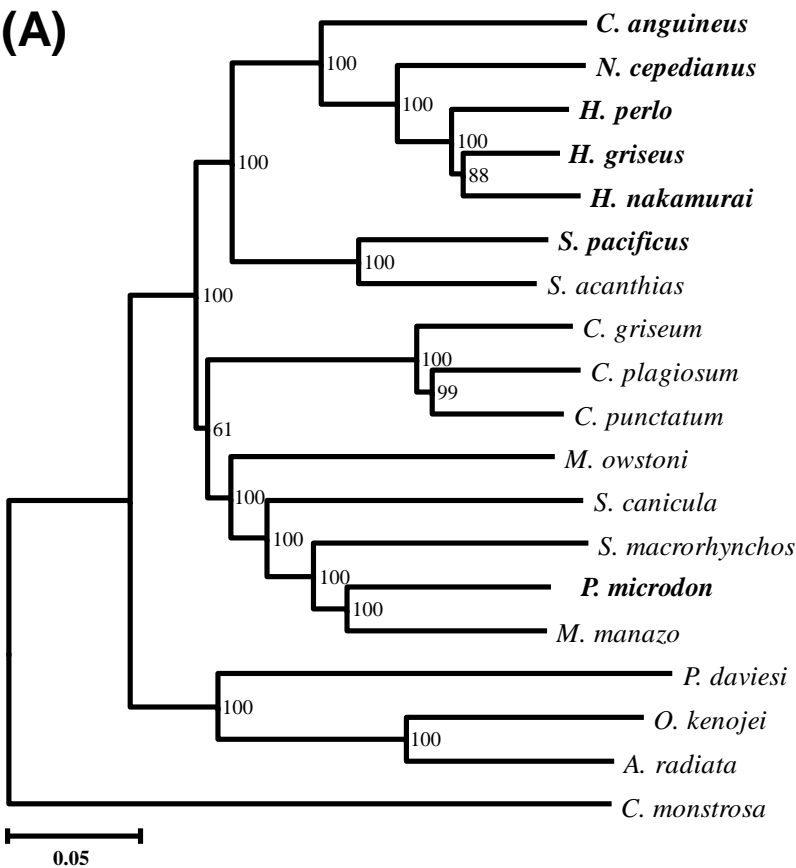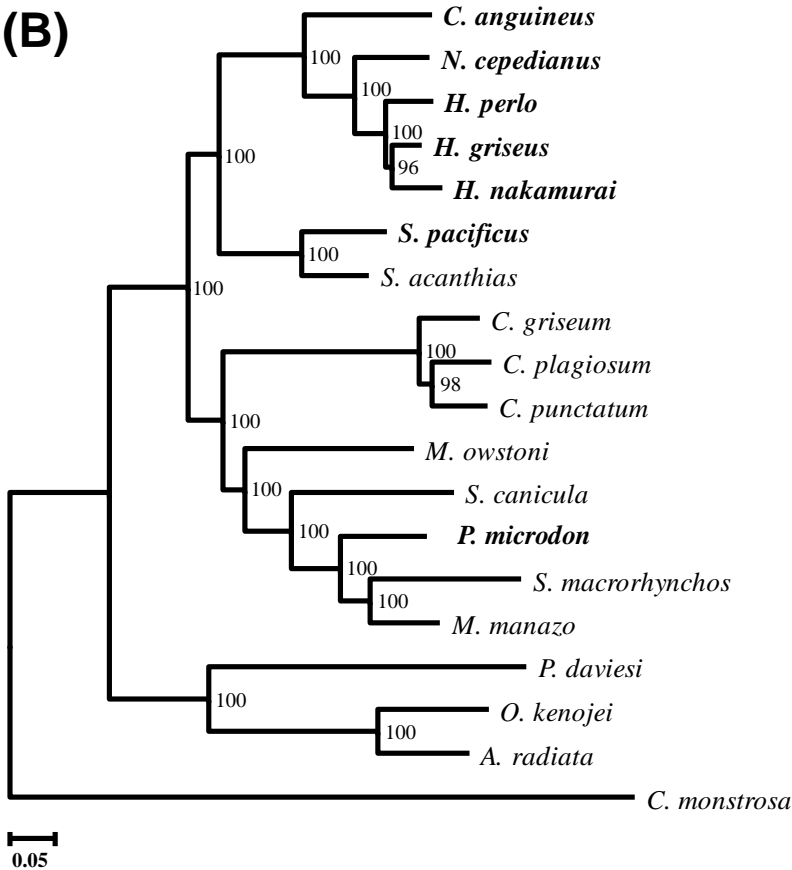

Supplementary figure 2

(A)

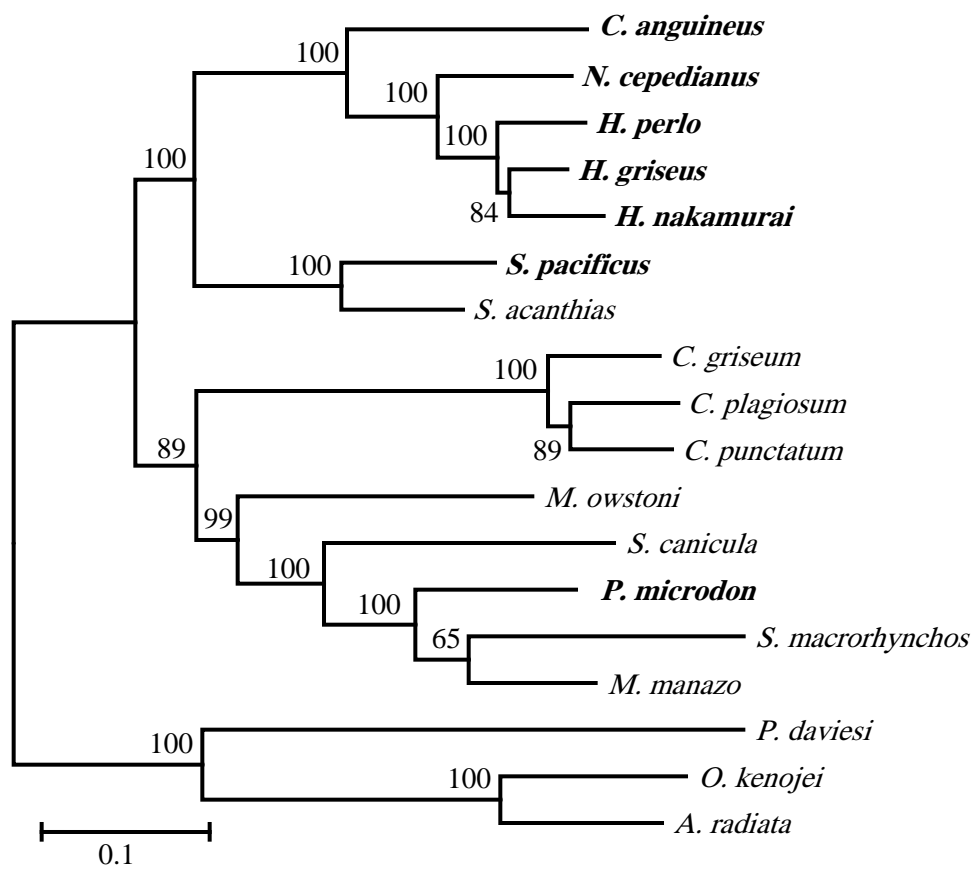

(B)

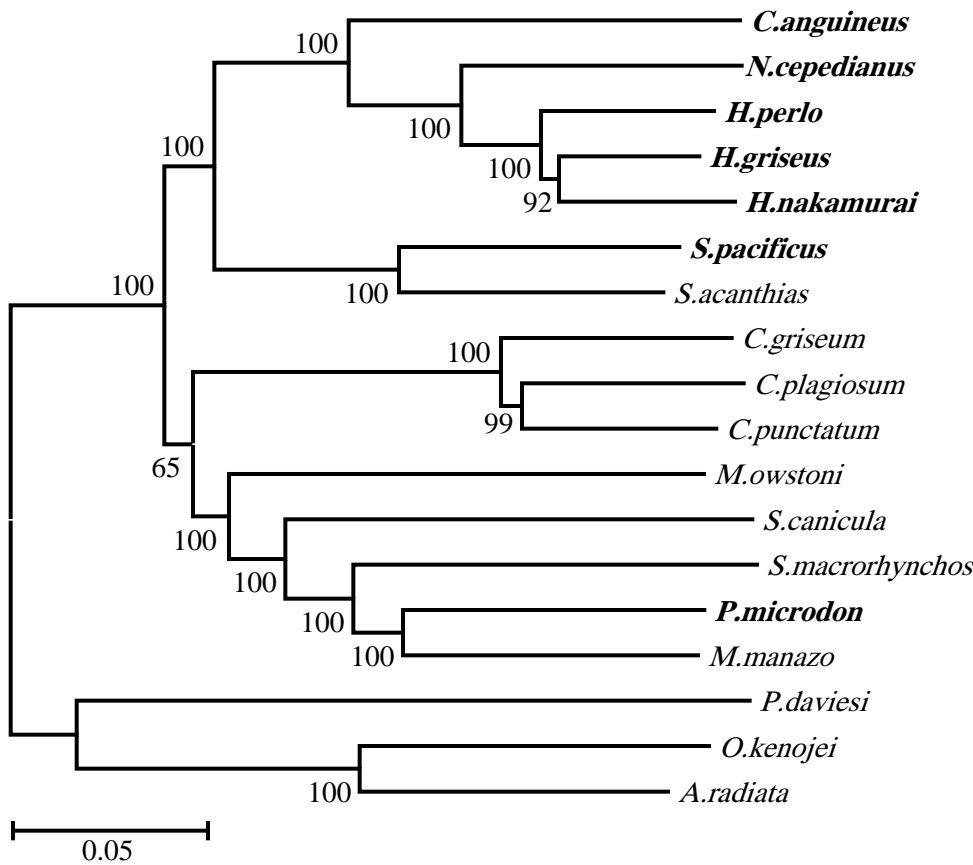

(C)

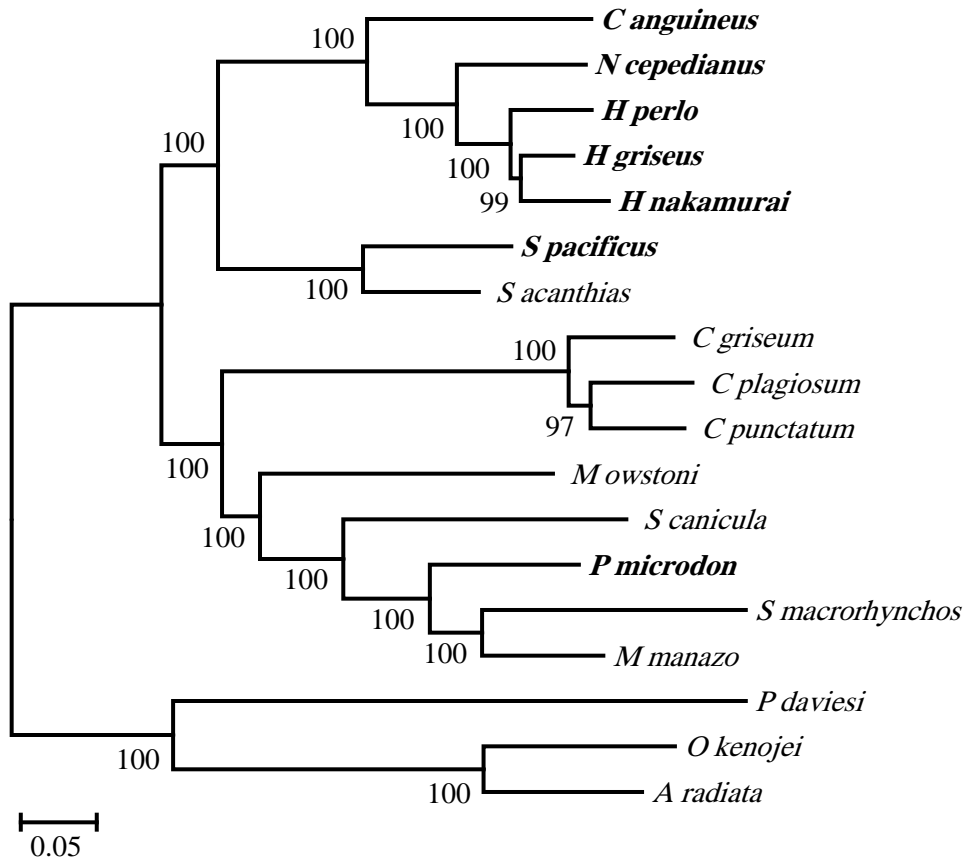

Supplement: f1 [file 147064.f1.pdf]
